# Supplementary material for: Improving and broadening luminescence in Gd2−xAlxGaSbO7:Cr3+ phosphors for NIR LED applications
Source: Royal Society of Chemistry journal article supplement (doi:10.1039/d3qi00229b), 2023-01-01
Supplement: d3qi00229b1.pdf [file d3qi00229b1.pdf]

## Supporting Information

### Improving and broadening luminescence in $\text{Gd}_{2-x}\text{Al}_x\text{GaSbO}_7:\text{Cr}^{3+}$ phosphors for NIR LEDs applications

Siyu Guo<sup>1</sup>, Ligan Ma<sup>1</sup>, Muniran·abudureyimu<sup>1</sup>, Rongfei Wei\*, Fumin Lu, Fangfang Hu and Hai Guo\*

\*Corresponding author

E-mail: [rfwei@zjnu.edu.cn](mailto:rfwei@zjnu.edu.cn), [ghh@zjnu.cn](mailto:ghh@zjnu.cn)

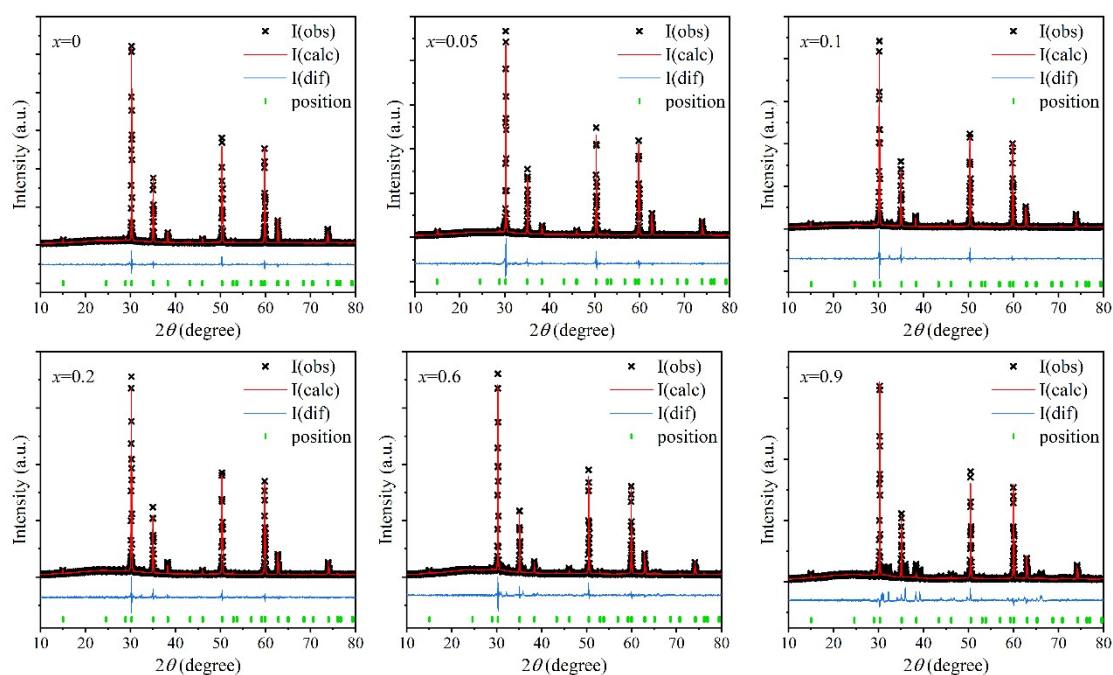

Figure S1. Rietveld refinement patterns of  $\text{Gd}_{2-x}\text{Al}_x\text{GaSbO}_7:5\%\text{Cr}^{3+}$  ( $x = 0-0.9$ ).

Table S1 Refined Crystallographic data of  $\text{Gd}_{2-x}\text{Al}_x\text{GaSbO}_7:5\%\text{Cr}^{3+}$  ( $x = 0-0.9$ ).

| Formula                   | $x = 0$  | $x = 0.05$ | $x = 0.1$ | $x = 0.2$ | $x = 0.6$ | $x = 0.9$ |
|---------------------------|----------|------------|-----------|-----------|-----------|-----------|
| Crystal system            | cubic    |            |           |           |           |           |
| Space group               | $Fd-3m$  |            |           |           |           |           |
| $a/b/c$ (Å)               | 10.27828 | 10.26376   | 10.26137  | 10.24885  | 10.23288  | 10.22578  |
| $\alpha/\beta/\gamma$ (°) | 90       | 90         | 90        | 90        | 90        | 90        |
| Volume (Å <sup>3</sup> )  | 1085.827 | 1081.235   | 1080.478  | 1076.528  | 1071.504  | 1069.273  |
| $R_{wp}\%$                | 8.53     | 9.71       | 10.85     | 9.71      | 11.03     | 16.29     |
| $R_p\%$                   | 6.63     | 7.45       | 8.19      | 7.59      | 8.29      | 11.03     |

Table S2  $D_{\text{dis}}$  of  $\text{Gd}_{2-x}\text{Al}_x\text{GaSbO}_7:5\%\text{Cr}^{3+}$  ( $x = 0-0.9$ ).

| $x$  | Gd-O1   | Gd-O2   | $d_{\text{av}}$ | $D_{\text{dis}}$ |
|------|---------|---------|-----------------|------------------|
| 0    | 2.22531 | 2.59608 | 2.50339         | 0.055540         |
| 0.05 | 2.22217 | 2.55440 | 2.47134         | 0.050412         |
| 0.1  | 2.22165 | 2.53620 | 2.457563        | 0.047997         |
| 0.2  | 2.21894 | 2.51544 | 2.44132         | 0.045544         |
| 0.6  | 2.21542 | 2.4777  | 2.41213         | 0.040775         |
| 0.9  | 2.21519 | 2.55951 | 2.47213         | 0.052397         |

Table S3 Spectral and lattice parameters of  $\text{G}_{1.4}\text{A}_{0.6}\text{GSO}:y\%\text{Cr}^{3+}$ .

| $y$  | C O ( $\text{cm}^{-1}$ ) | FWHM ( $\text{cm}^{-1}$ ) | $S$ ( $\text{cm}^{-1}$ ) | $\hbar\omega$ ( $\text{cm}^{-1}$ ) |
|------|--------------------------|---------------------------|--------------------------|------------------------------------|
| 0.25 | 2979                     | 2241                      | 3.40                     | 514                                |
| 0.5  | 3141                     | 2237                      | 3.70                     | 491                                |
| 1    | 3259                     | 2242                      | 3.91                     | 478                                |
| 2    | 3335                     | 2244                      | 4.05                     | 470                                |
| 4    | 3472                     | 2246                      | 4.32                     | 455                                |
| 5    | 3452                     | 2214                      | 4.39                     | 443                                |
